# Supplementary material for: m7GRegpred: substrate prediction of N7-methylguanosine (m7G) writers and readers based on sequencing features
Source: Front Genet. 2024 Aug 28;15:1469011. doi: 10.3389/fgene.2024.1469011 (PMC11387174; doi:10.3389/fgene.2024.1469011)
Supplement: Supplementary file 3 [file DataSheet1.XLSX]

## Sheet: Table S1
Supplementary Table S1. Public tools for the prediction of m7G sites.
Tool	Link	Features	Approache	PMID
iRNA-m7G	http://lin-group.cn/server/iRNA-m7G/	NPF, SSC, PseDNC	SVM	31581051
m7GHub (m7GFinder)	www.xjtlu.edu.cn/biologicalsciences/m7ghub	Sequence and genome derived features	SVM	32163126
m7g-model	https://github.com/MapFM/m7g_model.git	OH, CP, NC, k-mer, PKC	SVM	32721444
m7GPredictor	https://github.com/NWAFU-LiuLab/m7Gpredictor	NP, k-mer, PseDNC, Ksnpf, PKC	SVM	32805275
m7G-IFL	http://server.malab.cn/m7G-IFL/	PCP, CP, BKF	XGBoost	33169141
XG-m7G	http://flagship.erc.monash.edu/XG-m7G/	OH, NAC, ENAC, CP, ANF, SCPseDNC	XGBoost	33230441
BERT-m7G	N/A	BERT	EN	34484416
m7G-DPP	https://figshare.com/articles/online_resource/m7G-DPP/15000348	PC	LASSO	34628276
Zou et al.	N/A	AC, DWT, CC	SVM	34709657
THRONE	http://thegleelab.org/THRONE/	SCPseDNC, MMI,NRF, DBPF, MBE, ENAC, CKSNAP, NCPD	EL	35662472
Zhang et al.	http://github.com/jingry/autoBioSeeqpy/tree/2.0/examples/m7G	OH, RNA Nucleotide Compositions, Secondary Structure and Thermodynamic Stability Features, Base-Pair Distance Features, Local Structure-Sequence Triplet Elements	CNN	37305295
m7GHub V2.0 (m7GFinder)	http://www.rnamd.org/m7GHub2/tool.html	OH	DNN	37811871
TMSC-m7G	http://39.105.212.81/	Position embedding	CNN	38089465
Note: N/A: not available. Approaches: LASSO: least absolute shrinkage and selection operator; EN: elastic net; EL: ensemble learning; XGBoost: extreme gradient boosting; SVM: support vector machine; CNN: convolutional neural network; DNN: deep neural network. Features: NPF: nucleotide property and frequency; SSC: secondary structure component; PseDNC: pseudo nucleotide composition; OH: Binary enc…
